# Supplementary material for: Changes in Antioxidative, Oxidoreductive and Detoxification Enzymes during Development of Aphids and Temperature Increase
Source: MDPI journal article supplement (doi:10.3390/antiox10081181), 2021-07-25
Supplement: s1 [file s1]

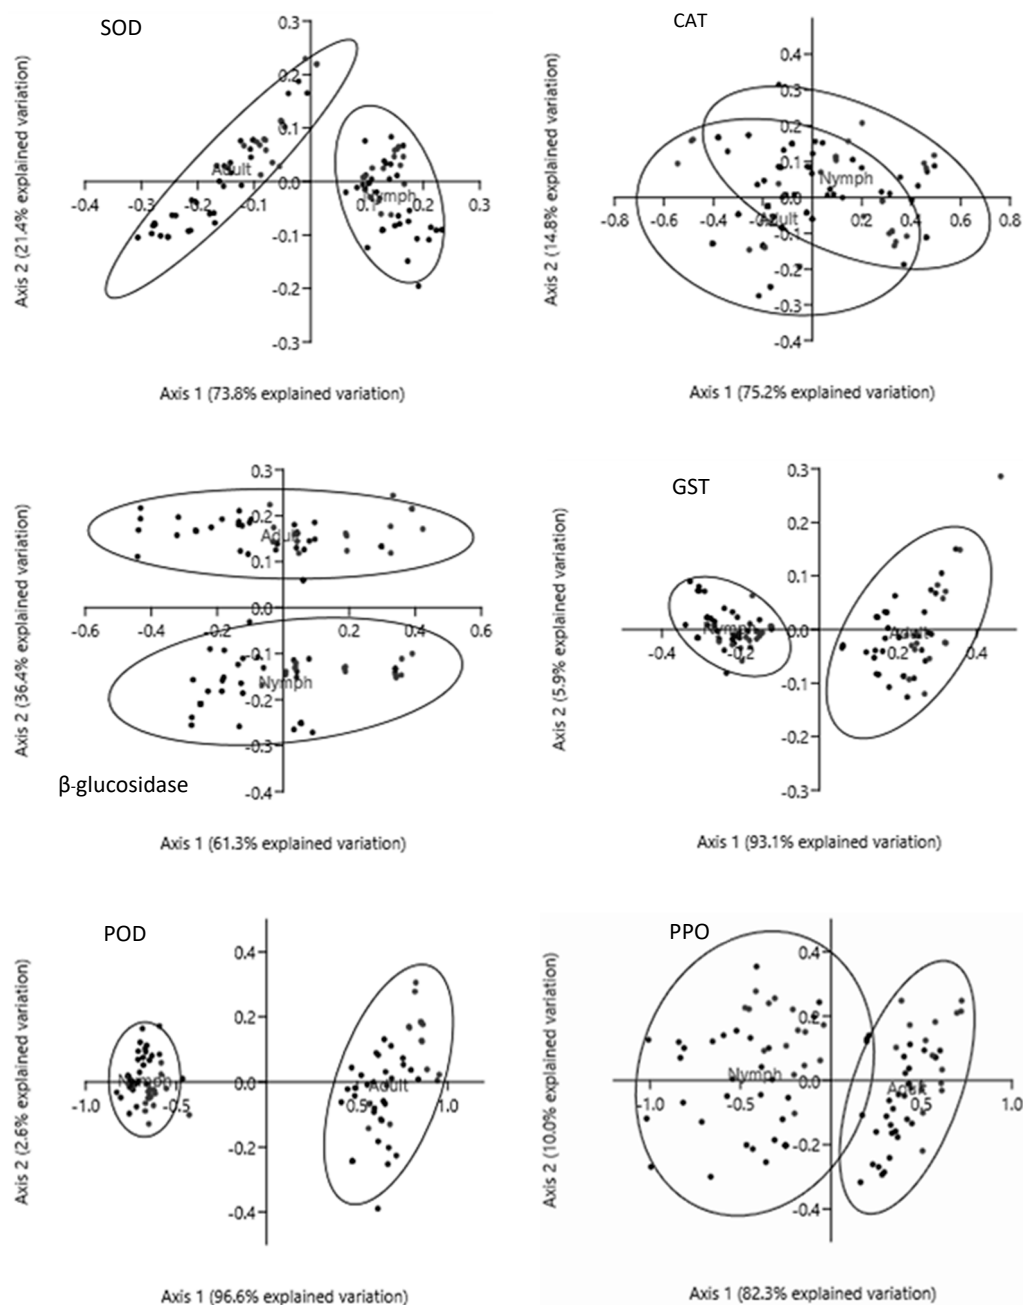

**Figure S1.** Principle component analysis (PCA) of enzymes data set of three aphid species. The groups are marked with 95% ellipses.
